# Supplementary material for: MicroRNA-184 inhibits cell proliferation and invasion, and specifically targets TNFAIP2 in Glioma
Source: PubMed Central journal article supplement (PMC4387599; doi:10.1186/s13046-015-0142-9), 2015-03-26
Supplement: 13046_2015_142_MOESM1_ESM.pdf [file 13046_2015_142_MOESM1_ESM.pdf]

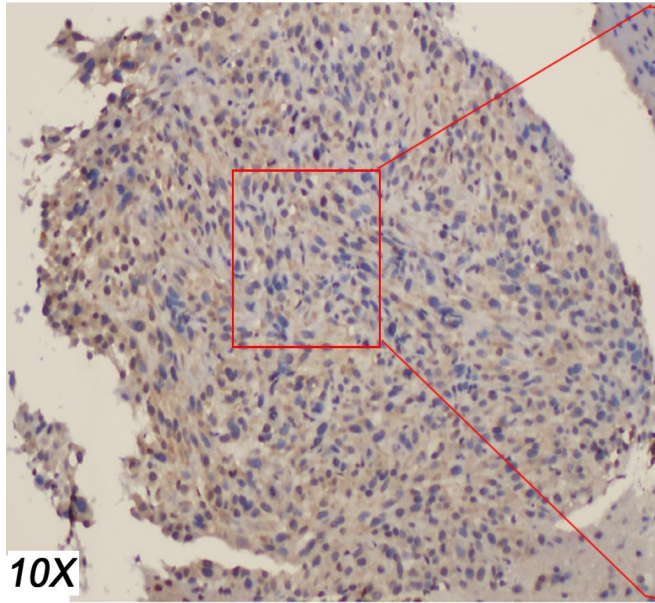

SOX2

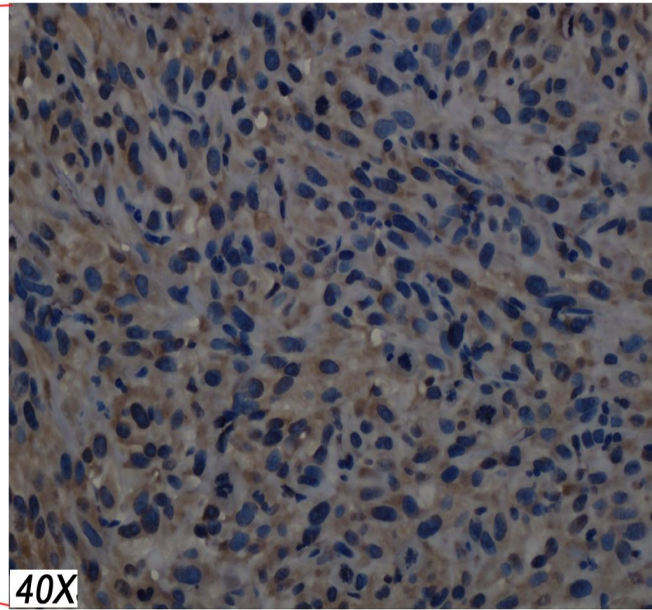

SOX2
